# Supplementary material for: Superparamagnetic bi-functional composite bead for the thermal ionization mass spectrometry of plutonium(iv) ions
Source: Royal Society of Chemistry journal article supplement (doi:10.1039/c5ra18419c), 2015-12-14

## † Electronic Supplementary Information

### Superparamagnetic bi-functional composite bead for thermal ionization mass spectrometry of plutonium(IV) ions

Sumana Paul,<sup>a\*</sup> Ashok K. Pandey,<sup>b</sup> Raju V. Shah,<sup>a</sup> D. Alamelu<sup>a</sup> and Suresh K. Aggarwal<sup>a\*</sup>

---

<sup>a.</sup> *Fuel Chemistry Division, Bhabha Atomic Research Centre, Trombay, Mumbai-400 085, India. Tel.: +91 22 25593740; fax: +91 22 25505150/25505151. E-mail addresses: sumana@barc.gov.in (S. Paul), skaggr2002@gmail.com (S.K. Aggarwal).*

<sup>b.</sup> *Radiochemistry Division, Bhabha Atomic Research Centre, Trombay, Mumbai 400 085, India; and Homi Bhabha National Institute, Anushaktinagar, Mumbai 400 094, India. E-mail: ashokk@barc.gov.in.*

**Scheme S1.** Chemical structures of 3-(acrylamido propyl) trimethylammonium chloride (a) and phosphoric acid 2-hydroxyethyl methacrylate ester (b) used for grafting on the PES beads.

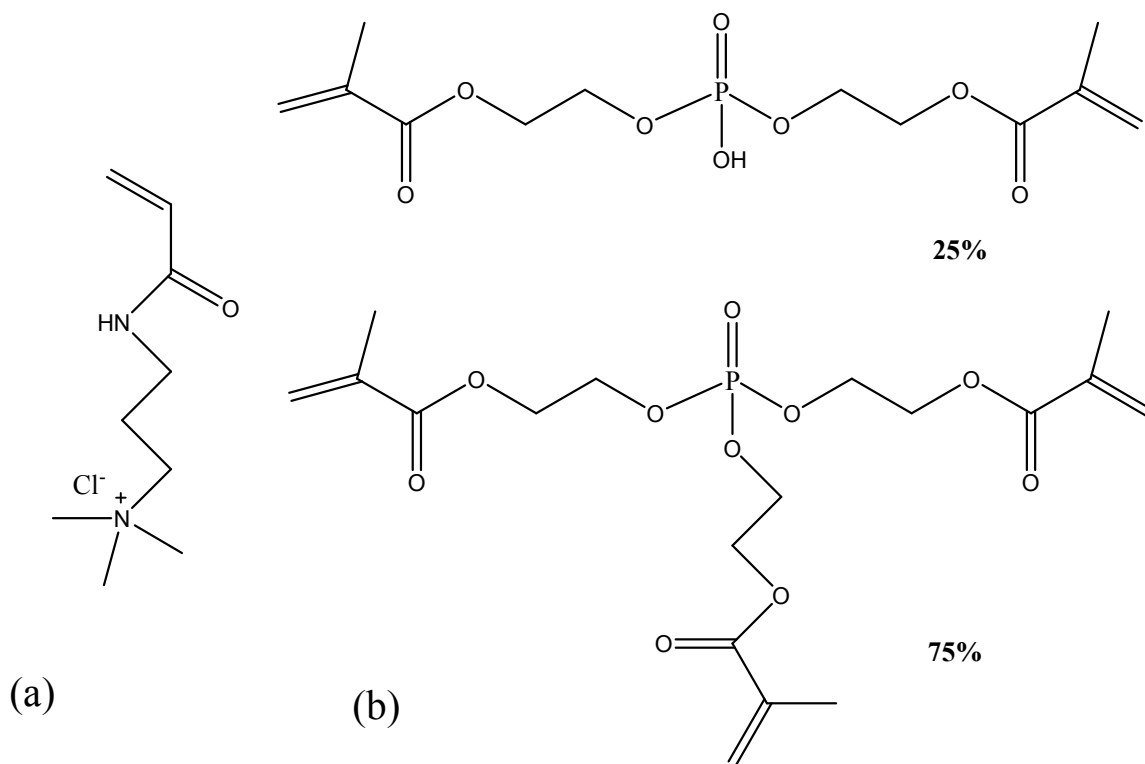

**Fig. S1** Comparison of elemental profiles of poly(HEMP-co-APTAC) grafted magnetic PES beads before and after subjecting to the equilibrations with 3 and 8 mol L<sup>-1</sup> HNO<sub>3</sub>.

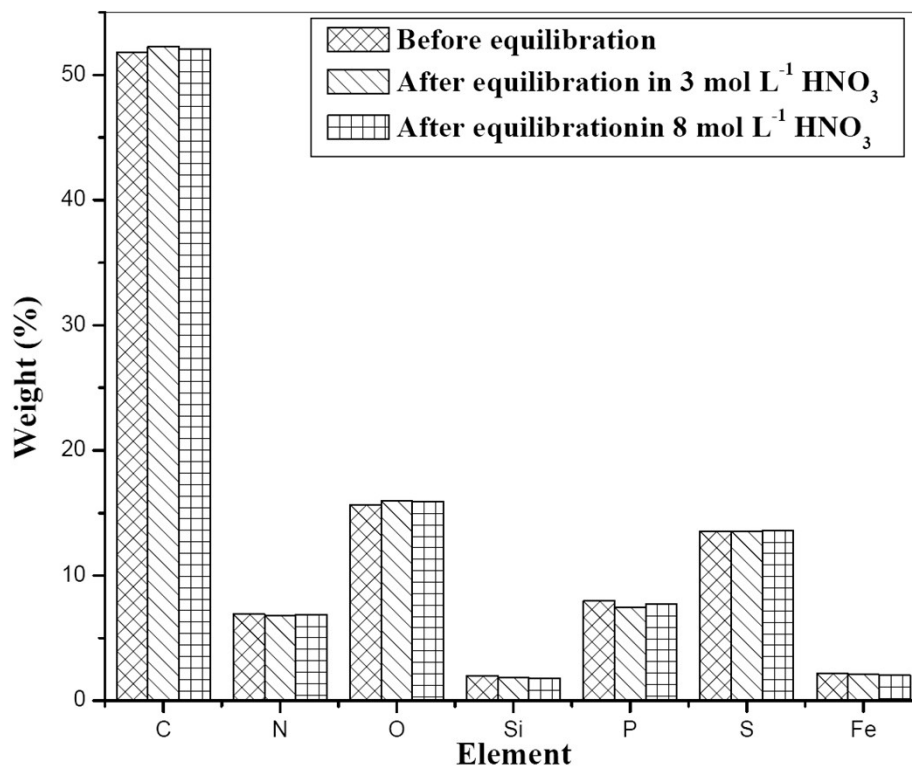

**Fig. S2** Attainment of sorption equilibrium of Pu(IV) and pseudo-second order rate of sorption of Pu(IV) by poly(HEMP-co-APTAC) grafted magnetic PES bead in 3 M HNO<sub>3</sub>.

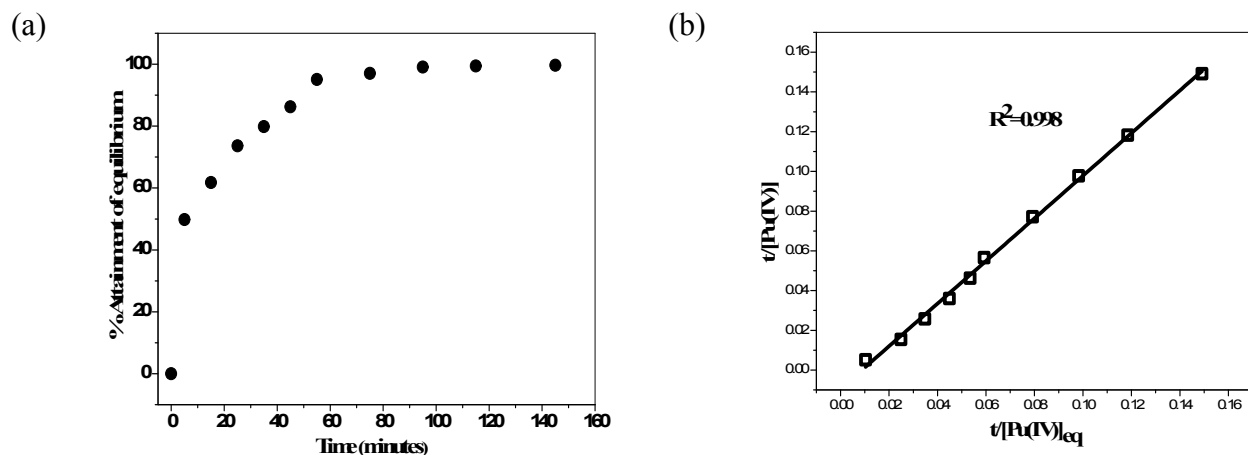

The sorption rate profile could be fitted to linearized pseudo-second order rate equation given below, which is normally observed in chemical sorption of ions at tracer concentration into the sorbent.

$$\frac{t}{Q_t} = \frac{1}{K_2 Q_e^2} + \frac{t}{Q_e}$$

where  $Q_t$  and  $Q_e$  are the amounts of solute sorbed per unit weight of the sorbent at time  $t$  and at equilibrium, respectively, and  $K_2$  is the pseudo-second-order rate constant of sorption.

**Fig. S3** Effect of volume on extraction efficiency of Pu(IV) by poly(HEMP-co-APTAC) grafted magnetic PES bead in 3 M HNO<sub>3</sub> medium.

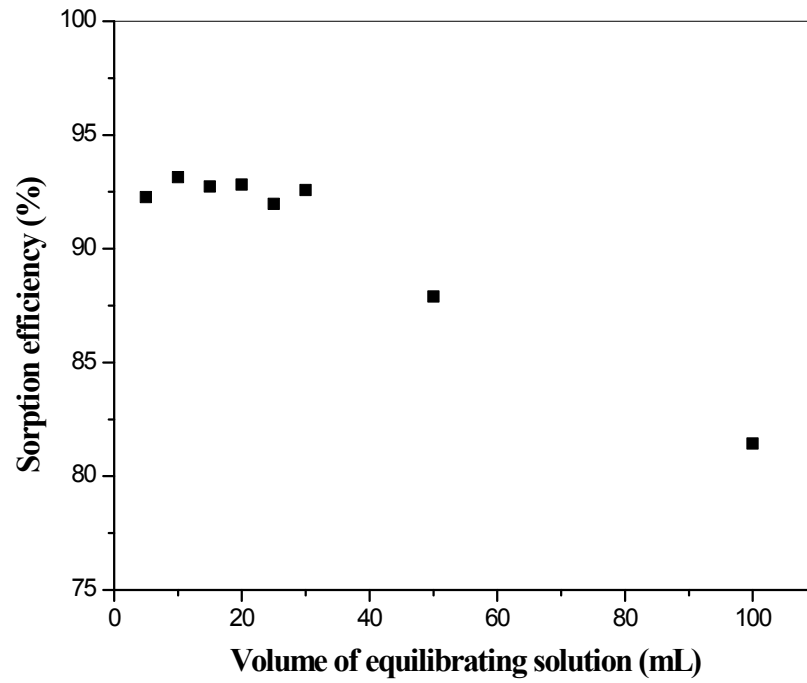

**Fig. S4** Effect of degassing time prior to TIMS analysis on the standard deviation of observed isotope ratios.

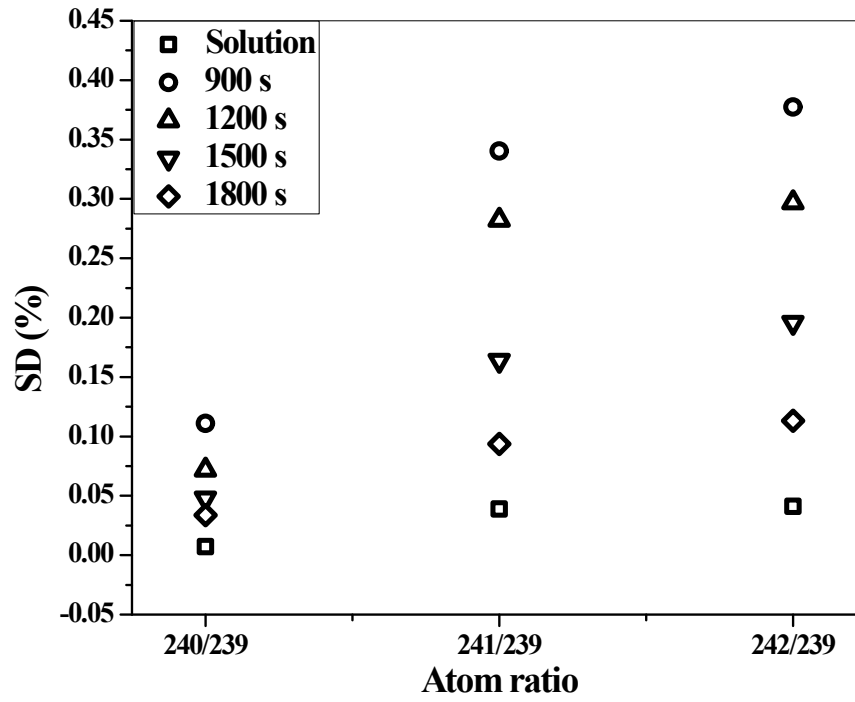

Supplement: c5ra18419c1.pdf [file c5ra18419c1.pdf]
